# Supplementary material for: Routes to Research for Novice Undergraduate Neuroscientists
Source: Atypon-hosted journal article supplement (doi:10.1187/cbe.05-09-0119), 2006-06-01
Supplement: supplementalmaterial1.pdf [file supplementalmaterial1.pdf]

## Appendix 1

### Poster Titles

#### Apprenticeship Model Participants

1. Utilizing Functional Magnetic Resonance Imaging to Investigate Atypical Brain Function Associated with Autism Spectrum Disorder
2. Collaborative Longitudinal Schizophrenia Prodromal Study Proposal
3. Magnetic Resonance Imaging (MRI) and the Effects of Fetal Alcohol Syndrome (FAS)
4. Intra-rater and Inter-rater Reliability Assessment for Volumetric Analysis of Structures in Patients with Mesial Temporal Lobe Epilepsy
5. Emotional Memory and the Retrograde Amnesia Effect on Positive and Negative Stimuli
6. Emotional Memory and the Retrograde Effect of Negative and Positive Pictures
7. The Occurrence of Psychological Aggression, Physical Aggression, and Sexual Coercion in Intimate Dating Relationships
8. The Relation of Maternal Soothing and Sensitivity to Infant Cortisol Levels in Response to a Psychosocial Stressor
9. Activation of BNST 5HT1A Receptors Decreases Anxiety as Measured by Acoustic Startle Behavior
10. Differential Regulation of BDNF, CCD, and CB1 mRNA in the Basolateral Amygdala Following the Extinction of Fear
11. Connectivity in Olfactory System with Olfactory Learning in Mice
12. Comparison of Intraspecific Proximity Patterns and Behaviors, and Interspecific Aggression between Red-Ruffed and Ring-Tailed Lemurs in Captivity
13. Examining the Social Interactions of Golden Lion Tamarins in an Inside versus Outside Enclosure
14. A Test of the Effects of Foraging competition on Spatial Memory Performance in Rhesus Monkeys (*Macaca mulatta*) in an Open-field Foraging Room
15. Stimulus-Reward Associative Learning: Maturation and Effects of Neonatal Orbital Frontal Cortex Lesions in Infant Monkeys
16. Neurotoxic Lesions of the Amygdala in Infant and Adult Rhesus Monkeys Do Not Impair Stimulus-Reward Association Learning

17. Effects of Aging and Hormonal Status on Bimanual Motor Function in Rhesus Monkeys
18. The Role of Fibronectin in Traumatic Brain Injury
19. Limb Postural Effects on the Neuromechanical Control of the Legs During Human Hopping
20. Progress Toward a Two-Photon Laser Scanning Microscope for Long-Term Imaging of Thick Live Cell Cultures
21. Calibration and Optimization of a Custom-Built Multi-Photon Laser Scanning Microscope
22. A Comfortable Multi-electrode Array's Connector Interface Used for Surface Stimulation of In Vitro Neonatal Rat Spinal Cord
23. The Estrous Cycle Plays a Critical Role in Scent-Induced Flank marking in Female Syrian Hamsters
24. Odor Preference Across the Estrous Cycle in the Syrian Hamster (*Mesocricetus auratus*) Using an Automated Y-Maze
25. How Oxytocin and Glutamate Release in the Nucleus Accumbens Correlate with Partner Preference in Female Prairie Voles
26. Do the Memory-Impairing Effects of Septal GABA Receptor Activation Involve the Septo-Hippocampal GABAergic Projection?
27. C-Fos Expression in the Dorsal Raphe Nucleus Following Aggressive Encounters in Male Syrian Hamsters?
28. NPY Receptor Subtypes Differentially Affect Ingestive Behaviors in Siberian Hamsters (*Phodopus sungorus*)
29. The Effects of Pollutants and Cold Shock on the Trail-Following Behavior of Termite Workers
30. An Investigation in White, Sticky Stuff: The Sea Hare Secretion Opaline's Role in Chemical Defense Against Predatory Lobsters

### **Collaborative Learning Model Participants**

1. Rate of Habituation Compared between Dark Isolated and Light Isolated Crayfish
2. Behavioral and Electrophysiological Analyses of Ethanol Effects on Male and Female Crayfish
3. The Role of Stress Hormones on the Behavior of Dominant and Subordinate Crayfish
4. Effects of Amphetamine and the Role of CREB on Learning and Memory in Crayfish
5. Sexually Dimorphic Effects of Amphetamine on Crayfish
